# Supplementary material for: A 5-aminoisophthalic acid low molecular weight gelator based novel semiconducting supramolecular Zn(ii)-metallogel: unlocking an efficient Schottky barrier diode for microelectronics
Source: Royal Society of Chemistry journal article supplement (doi:10.1039/d3na00671a), 2023-01-01
Supplement: d3na00671a1.pdf [file d3na00671a1.pdf]

## Electronic Supplementary Information†

### **5-aminoisophthalic acid low molecular weight gelator based novel Semiconducting Supramolecular Zn(II)-Metallogel: Unlocking Efficient Schottky Barrier Diode for Microelectronics**

Subhendu Dhibar,<sup>\*a</sup> Baishakhi Pal,<sup>b</sup> Kripasindhu Karmakar,<sup>a</sup> Sanjay Roy,<sup>c</sup> Sk Abdul Hafiz,<sup>d</sup> Arpita Roy,<sup>e</sup> Subham Bhattacharjee,<sup>d</sup> Soumya Jyoti Ray,<sup>c</sup> Partha Pratim Ray,<sup>\*b</sup> and Bidyut Saha<sup>\*a</sup>

<sup>a</sup>Colloid Chemistry Laboratory, Department of Chemistry, The University of Burdwan, Golapbag, Burdwan-713104, West Bengal, India \*E-mail: sdhibar@scholar.buruniv.ac.in, Tel: +91 7001575909 (S. Dhibar); \*E-mail: bsaha@chem.buruniv.ac.in, Tel: +91 9476341691 (B. Saha).

<sup>b</sup>Department of Physics, Jadavpur University, Jadavpur, Kolkata-700032, India; \*E-mail: parthap.ray@jadavpuruniversity.in; Tel: +91 3324572844 (P. P. Ray).

<sup>c</sup>Department of Chemistry, School of Science, NetajiSubhas Open University, Kalyani Regional Centre, Kolkata-741251, India.

<sup>d</sup>Department of Chemistry, KaziNazrul University, Asansol-713303, West Bengal, India.

<sup>e</sup>Department of Physics, Indian Institute of Technology Patna, Bihar-801106, India.

## EDX Spectrum Analysis

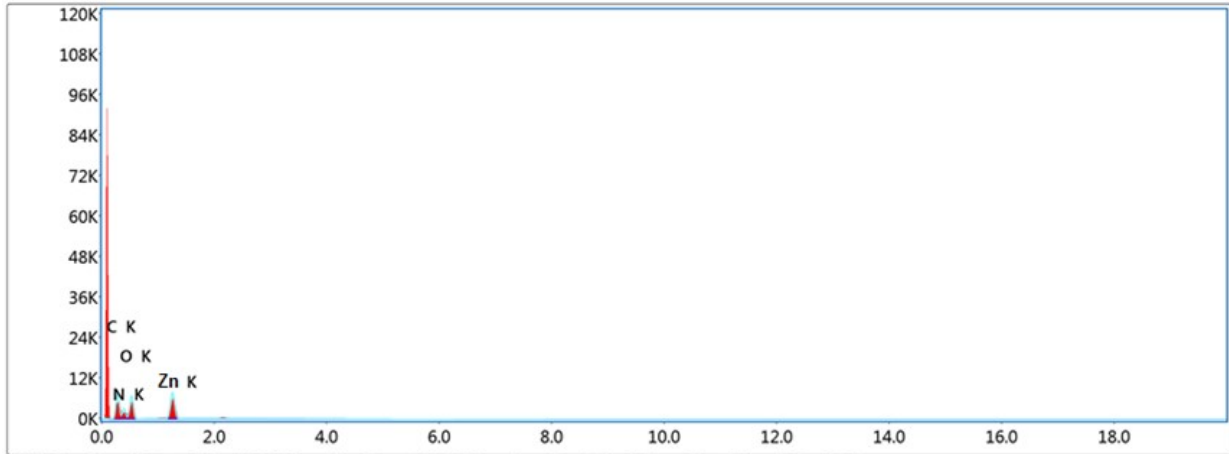

| Element | Weight % | Atomic % | Error % | Net Int. | K Ratio | Z      | A      | F      |
|---------|----------|----------|---------|----------|---------|--------|--------|--------|
| C K     | 28.95    | 35.88    | 7.80    | 323.58   | 0.1235  | 1.0427 | 0.4090 | 1.0000 |
| N K     | 21.46    | 22.81    | 10.14   | 131.23   | 0.0456  | 1.0153 | 0.2094 | 1.0000 |
| O K     | 34.44    | 32.04    | 9.57    | 309.87   | 0.0768  | 0.9916 | 0.2249 | 1.0000 |
| Zn K    | 15.14    | 9.27     | 4.83    | 413.58   | 0.0954  | 0.9080 | 0.6933 | 1.0009 |

Fig. S1. EDX spectrum analysis of ZnA-5AIA metallogel.

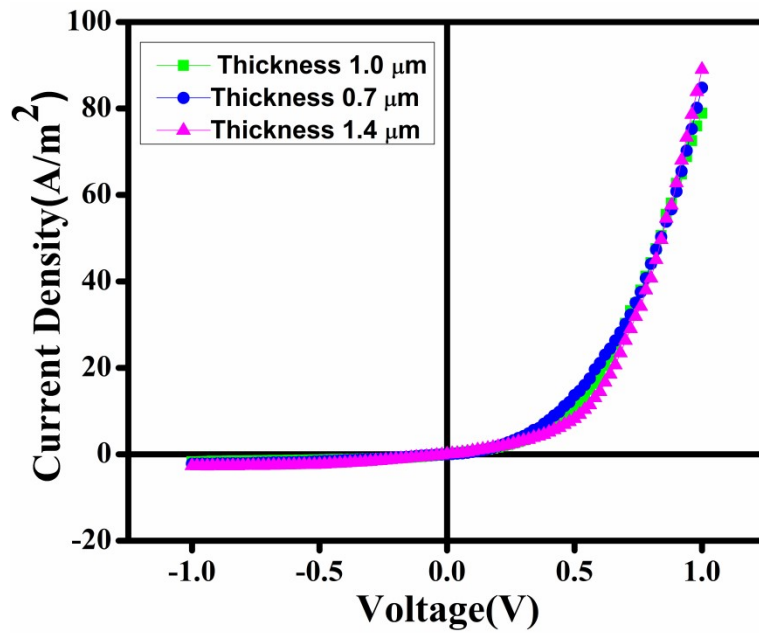

**Fig S2.** J–V characteristics curve of the fabricated devices varying the thickness of thin film of metallogel (Zn(II)).

**Table S1.** Comparison table of Electrical parameters of metallogel (Zn(II)) based thin film devices.

| <b>Thickness of Metallogel</b> | <b>Rectification Ratio</b> | <b>Conductivity (S.m-1)</b> |
|--------------------------------|----------------------------|-----------------------------|
| 0.7 $\mu\text{m}$              | 38.57                      | $1.33 \times 10^{-5}$       |
| 1.0 $\mu\text{m}$              | 45.11                      | $1.34 \times 10^{-5}$       |
| 1.4 $\mu\text{m}$              | 33.41                      | $1.19 \times 10^{-5}$       |

From Table S1, it can be clearly shown that the thin film devices with thickness of ZnA-5AIA metallogel are about 1.0  $\mu\text{m}$  has the better rectification ratio than the two counter parts. In addition one of the vital electrical parameter of the devices i.e. conductivity of the devices with thickness of metallogel are about 1.0  $\mu\text{m}$  shows better score than the devices with thickness 1.4  $\mu\text{m}$ , while the conductivity is almost same with the devices with thickness 0.7  $\mu\text{m}$ . That's why we have decided for further analyses of the electrical properties of the devices with thickness of ZnA-5AIA metallogel are about 1.0  $\mu\text{m}$ .
